# Supplementary material for: Midwives’, Obstetricians’, and Recently Delivered Mothers’ Perceptions of Remote Monitoring for Prenatal Care: Retrospective Survey
Source: PubMed Central journal article supplement (PMC6487343; doi:10.2196/10887), 2019-04-15
Supplement: jmir_v21i4e10887_app1.pdf [file jmir_v21i4e10887_app1.pdf]

## Questionnaire for midwives

### 1. Background information

| Variable                                                                         | N  | Response frequencies      |                                |                              |                               |                      |
|----------------------------------------------------------------------------------|----|---------------------------|--------------------------------|------------------------------|-------------------------------|----------------------|
| <b>How old are you?</b>                                                          |    |                           |                                |                              |                               |                      |
|                                                                                  |    | <b>20 – 25 years</b>      | <b>26 – 30 years</b>           | <b>31 – 35 years</b>         | <b>36 – 40 years</b>          | <b>&gt; 40 years</b> |
|                                                                                  | 35 | 3<br>(8.57%)              | 8<br>(22.86%)                  | 7<br>(20.00%)                | 3<br>(8.57%)                  | 14 (40.00%)          |
| <b>Which is your highest level of education?</b>                                 |    |                           |                                |                              |                               |                      |
|                                                                                  |    | <b>Student</b>            | <b>High school</b>             | <b>University</b>            |                               |                      |
|                                                                                  | 35 | 0<br>(0.00%)              | 35<br>(100.00%)                | 0<br>(0.00%)                 |                               |                      |
| <b>How many years of work experience do you have?</b>                            |    |                           |                                |                              |                               |                      |
|                                                                                  |    | <b>&lt; 5 years</b>       | <b>5 – 15 years</b>            | <b>16 – 25 years</b>         | <b>&gt; 25 years</b>          |                      |
|                                                                                  | 35 | 8<br>(22.86%)             | 15<br>(42.86%)                 | 4<br>(11.43%)                | 8<br>(22.86%)                 |                      |
| <b>Before you started this job, did you already have work experiences in ...</b> |    |                           |                                |                              |                               |                      |
|                                                                                  |    | <b>A private practice</b> | <b>A secondary care center</b> | <b>A primary care center</b> |                               |                      |
| Yes                                                                              | 35 | 2<br>(5.71%)              | 12<br>(34.29%)                 | 17<br>(50.00%)               |                               |                      |
| <b>On which department are you working at this moment?</b>                       |    |                           |                                |                              |                               |                      |
|                                                                                  |    | <b>Delivery room</b>      | <b>Maternity</b>               | <b>Prenatal ward</b>         | <b>Prenatal consultations</b> |                      |
|                                                                                  | 35 | 11<br>(31.43%)            | 8<br>(22.86%)                  | 10<br>(28.57%)               | 6<br>(17.14%)                 |                      |

## 2. Perception about remote monitoring

| Variable                                                                                                                                         | N  | Response frequencies |                |                |                |                |
|--------------------------------------------------------------------------------------------------------------------------------------------------|----|----------------------|----------------|----------------|----------------|----------------|
| <b>On a scale from 1 to 5 (with 5 being mostly agree) how would you rate the use of remote monitoring as being an added value for ...</b>        |    |                      |                |                |                |                |
|                                                                                                                                                  |    | <b>1</b>             | <b>2</b>       | <b>3</b>       | <b>4</b>       | <b>5</b>       |
| The pregnant woman                                                                                                                               | 35 | 0<br>(0.00%)         | 2<br>(5.71%)   | 5<br>(14.29%)  | 18<br>(51.43%) | 10<br>(28.57%) |
| The midwife                                                                                                                                      | 35 | 0<br>(0.00%)         | 2<br>(5.71%)   | 9<br>(25.71%)  | 15<br>(42.86%) | 9<br>(25.71%)  |
| The general practitioner                                                                                                                         | 35 | 1<br>(2.86%)         | 4<br>(11.43%)  | 8<br>(22.86%)  | 14<br>(40.00%) | 8<br>(22.86%)  |
| The obstetrician                                                                                                                                 | 35 | 0<br>(0.00%)         | 1<br>(2.86%)   | 4<br>(11.43%)  | 16<br>(45.71%) | 14<br>(40.00%) |
| The society                                                                                                                                      | 35 | 0<br>(0.00%)         | 1<br>(2.86%)   | 14<br>(40.00%) | 11<br>(31.43%) | 9<br>(25.71%)  |
| <b>On a scale from 1 to 5 (with 5 being mostly agree), how would you rate the devices which are used on this moment to detect pre-eclampsia?</b> |    |                      |                |                |                |                |
|                                                                                                                                                  |    | <b>1</b>             | <b>2</b>       | <b>3</b>       | <b>4</b>       | <b>5</b>       |
| The blood pressure monitor                                                                                                                       | 35 | 0<br>(0.00%)         | 0<br>(0.00%)   | 7<br>(20.00%)  | 16<br>(45.71%) | 12<br>(34.29%) |
| The activity tracker                                                                                                                             | 35 | 2<br>(5.71%)         | 3<br>(8.57%)   | 17<br>(48.57%) | 12<br>(34.29%) | 1<br>(2.86%)   |
| The weight scale                                                                                                                                 | 35 | 1<br>(2.86%)         | 2<br>(5.71%)   | 11<br>(31.43%) | 16<br>(45.71%) | 5<br>(14.29%)  |
| <b>Rate the following questions on a scale from 1 to 5 (with 5 being mostly agree).</b>                                                          |    |                      |                |                |                |                |
|                                                                                                                                                  |    | <b>1</b>             | <b>2</b>       | <b>3</b>       | <b>4</b>       | <b>5</b>       |
| Before the study started, I did already know what remote monitoring meant.                                                                       | 35 | 8<br>(22.86%)        | 12<br>(34.29%) | 7<br>(20.00%)  | 6<br>(17.14%)  | 2<br>(5.71%)   |
| Before the study started, I did already know what remote monitoring aims.                                                                        | 35 | 8<br>(22.86%)        | 11<br>(31.43%) | 8<br>(22.86%)  | 7<br>(20.00%)  | 1<br>(2.86%)   |
| Before the study started, I already had some practical experiences with remote monitoring.                                                       | 35 | 24<br>(68.57%)       | 5<br>(14.29%)  | 2<br>(5.71%)   | 2<br>(5.71%)   | 2<br>(5.71%)   |
| The use of remote monitoring is an added value on my daily work package.                                                                         | 35 | 13<br>(37.14%)       | 9<br>(25.71%)  | 6<br>(17.14%)  | 5<br>(14.29%)  | 2<br>(5.71%)   |
| The use of remote monitoring is an threat for my daily work package.                                                                             | 35 | 24<br>(68.57%)       | 5<br>(14.29%)  | 4<br>(11.43%)  | 2<br>(5.71%)   | 0<br>(0.00%)   |

### 3. Education

| Variable                                                                                                                                                                                | N  | Response frequencies |              |               |                |                |
|-----------------------------------------------------------------------------------------------------------------------------------------------------------------------------------------|----|----------------------|--------------|---------------|----------------|----------------|
| On a scale from 1 to 5 (with 5 being mostly agree), on which item do you think (para)medical personnel should have an extra education before they start to work with remote monitoring? |    |                      |              |               |                |                |
|                                                                                                                                                                                         |    | 1                    | 2            | 3             | 4              | 5              |
| Which explanation we have to give the patients before they start to use remote monitoring.                                                                                              | 35 | 0<br>(0.00%)         | 0<br>(0.00%) | 4<br>(11.43%) | 16<br>(45.71%) | 15<br>(42.86%) |
| How we can support the patients in order to have a high compliance rate.                                                                                                                | 35 | 0<br>(0.00%)         | 0<br>(0.00%) | 8<br>(22.86%) | 14<br>(40.00%) | 13<br>(37.14%) |
| About the technology of the devices which are used for remote monitoring.                                                                                                               | 35 | 0<br>(0.00%)         | 1<br>(2.86%) | 7<br>(20.00%) | 13<br>(37.14%) | 14<br>(40.00%) |
| About the protocols which have to be used in the remote monitoring of different complications.                                                                                          | 35 | 0<br>(0.00%)         | 0<br>(0.00%) | 5<br>(14.29%) | 15<br>(42.86%) | 15<br>(42.86%) |

#### 4. Quality and patient safety

| Variable                                                                                                                                              | N  | Response frequencies |                |                |                |               |
|-------------------------------------------------------------------------------------------------------------------------------------------------------|----|----------------------|----------------|----------------|----------------|---------------|
| <b>Rate the following questions on a scale from 1 to 5 (with 5 being mostly agree).</b>                                                               |    |                      |                |                |                |               |
|                                                                                                                                                       |    | <b>1</b>             | <b>2</b>       | <b>3</b>       | <b>4</b>       | <b>5</b>      |
| Do you think that remote monitoring will make the patient unnecessarily worried?                                                                      | 35 | 5<br>(14.29%)        | 18<br>(51.43%) | 10<br>(28.57%) | 2<br>(5.71%)   | 0<br>(0.00%)  |
| Do you think that remote monitoring will give the patient a false safety feeling?                                                                     | 35 | 6<br>(17.14%)        | 13<br>(37.14%) | 11<br>(31.43%) | 5<br>(14.29%)  | 0<br>(0.00%)  |
| Do you think that remote monitoring will make your work easier?                                                                                       | 35 | 4<br>(11.43%)        | 5<br>(14.29%)  | 17<br>(48.57%) | 9<br>(25.71%)  | 0<br>(0.00%)  |
| Do you think that a remote monitoring prenatal follow-up program the care for women with a high risk for gestational hypertensive disorders improves? | 35 | 0<br>(0.00%)         | 0<br>(0.00%)   | 8<br>(22.86%)  | 19<br>(54.29%) | 8<br>(22.86%) |
| Do you think that a shift in healthcare is possible by using remote monitoring?                                                                       | 35 | 1<br>(2.86%)         | 1<br>(2.86%)   | 7<br>(20.00%)  | 19<br>(54.29%) | 7<br>(20.00%) |
| Do you think that remote monitoring will be a standard tool in healthcare in the future?                                                              | 35 | 0<br>(0.00%)         | 0<br>(0.00%)   | 8<br>(22.86%)  | 19<br>(54.29%) | 8<br>(22.86%) |
| Do you think it would be agreeable when more remote monitoring studies will be performed in the future?                                               | 35 | 1<br>(2.86%)         | 0<br>(0.00%)   | 16<br>(45.71%) | 14<br>(40.00%) | 4<br>(11.43%) |
| Do you think that the blood pressure of the pregnant women can be elevated because of the stress for the result?                                      | 35 | 2<br>(5.71%)         | 4<br>(11.43%)  | 9<br>(25.71%)  | 19<br>(54.29%) | 1<br>(2.86%)  |
| Do you think that the result of remote monitoring nog represent the reality?                                                                          | 35 | 2<br>(5.71%)         | 11<br>(31.43%) | 17<br>(48.57%) | 5<br>(14.29%)  | 0<br>(0.00%)  |
| <b>On a scale from 1 to 5 (with 5 being mostly agree), do you think the measurements will be done correctly by the pregnant women?</b>                |    |                      |                |                |                |               |
|                                                                                                                                                       |    | <b>1</b>             | <b>2</b>       | <b>3</b>       | <b>4</b>       | <b>5</b>      |
| The bloodpressure                                                                                                                                     | 35 | 0<br>(0.00%)         | 2<br>(5.71%)   | 13<br>(37.14%) | 17<br>(48.57%) | 3<br>(8.57%)  |
| The weight                                                                                                                                            | 35 | 0<br>(0.00%)         | 2<br>(5.71%)   | 14<br>(40.00%) | 15<br>(42.86%) | 4<br>(11.43%) |
| The activity- and sleepatarn                                                                                                                          | 35 | 0<br>(0.00%)         | 1<br>(2.86%)   | 16<br>(45.71%) | 15<br>(42.86%) | 3<br>(8.57%)  |
| <b>Rate the following questions on a scale from 1 to 5 (with 5 being mostly agree).</b>                                                               |    |                      |                |                |                |               |
|                                                                                                                                                       |    | <b>1</b>             | <b>2</b>       | <b>3</b>       | <b>4</b>       | <b>5</b>      |
| Patients will be reassured by the positive results on the app and will be less likely to have (unnecessary) prenatal visits.                          | 35 | 0<br>(0.00%)         | 2<br>(5.71%)   | 16<br>(45.71%) | 16<br>(45.71%) | 1<br>(2.86%)  |
| Patient will be more worried because they can see their measurements and will have more unscheduled prenatal visits.                                  | 35 | 2<br>(5.71%)         | 8<br>(22.86%)  | 18<br>(51.43%) | 6<br>(17.14%)  | 1<br>(2.86%)  |
| Patients need to have an extra prenatal consult when deviations are noticeable in the results.                                                        | 35 | 2<br>(5.71%)         | 1<br>(2.86%)   | 11<br>(31.43%) | 18<br>(51.43%) | 3<br>(8.57%)  |
| The feedback of the results to the patients is essential.                                                                                             | 35 | 0<br>(0.00%)         | 0<br>(0.00%)   | 10<br>(28.57%) | 16<br>(45.71%) | 9<br>(25.71%) |
| A lot of information will be become on a way which doesn't take much time                                                                             | 35 | 0<br>(0.00%)         | 2<br>(5.71%)   | 7<br>(20.00%)  | 19<br>(54.29%) | 7<br>(20.00%) |
| I don't like the additional reports I get from the researches.                                                                                        | 35 | 5<br>(14.29%)        | 8<br>(22.86%)  | 21<br>(60.00%) | 1<br>(2.86%)   | 0<br>(0.00%)  |
| A researcher is a new member of the multidisciplinary team. The communication gets more complicated in that way.                                      | 35 | 3<br>(8.57%)         | 10<br>(28.57%) | 17<br>(48.57%) | 3<br>(8.57%)   | 2<br>(5.71%)  |

## 5. Technology & interoperability

| Variable                                                                                                                                   | N  | Response frequencies |              |              |                |                |
|--------------------------------------------------------------------------------------------------------------------------------------------|----|----------------------|--------------|--------------|----------------|----------------|
| Rate the following questions on a scale from 1 to 5 (with 5 being mostly agree).                                                           |    |                      |              |              |                |                |
|                                                                                                                                            |    | 1                    | 2            | 3            | 4              | 5              |
| Do you think it would be an added value when the results of the remote motoring will be automatically send to the patients' medical files? | 35 | 1<br>(2.86%)         | 0<br>(0.00%) | 2<br>(5.71%) | 21<br>(60.00%) | 11<br>(31.43%) |

## 6. Feedback

| Variable                                                                                                                                                                       | N  | Response frequencies |                |                |                                   |                    |                |
|--------------------------------------------------------------------------------------------------------------------------------------------------------------------------------|----|----------------------|----------------|----------------|-----------------------------------|--------------------|----------------|
| <b>Indicate which answer is applicable</b>                                                                                                                                     |    |                      |                |                |                                   |                    |                |
|                                                                                                                                                                                |    | Daily                | Weekly         | Monthly        | Only when the values are abnormal | At its own request | Never          |
| When do you think the pregnant woman needs to receive an overview of her measurement?                                                                                          | 35 | 6<br>(17.14%)        | 15<br>(42.86%) | 5<br>(14.29%)  | 6<br>(17.14%)                     | 3<br>(8.57%)       | 0<br>(0.00%)   |
| When do you think the pregnant woman needs to receive an overview of the deliberation between the caregivers (based on her measurements) about her results?                    | 35 | 0<br>(0.00%)         | 18<br>(51.43%) | 6<br>(17.14%)  | 9<br>(25.71%)                     | 2<br>(5.71%)       | 0<br>(0.00%)   |
| <b>When do you think the pregnant woman needs to receive an overview (without a consultation by the midwife or the obstetrician) of her measurement on the following ways?</b> |    |                      |                |                |                                   |                    |                |
|                                                                                                                                                                                |    | Daily                | Weekly         | Monthly        | Only when the values are abnormal | At its own request | Never          |
| By telephone                                                                                                                                                                   | 35 | 0<br>(0.00%)         | 11<br>(31.43%) | 3<br>(8.57%)   | 15<br>(42.86%)                    | 7<br>(20.00%)      | 8<br>(22.86%)  |
| By email                                                                                                                                                                       | 35 | 2<br>(5.71%)         | 12<br>(34.29%) | 6<br>(17.14%)  | 4<br>(11.43%)                     | 10<br>(28.57%)     | 6<br>(17.14%)  |
| By text message                                                                                                                                                                | 35 | 2<br>(5.71%)         | 5<br>(14.29%)  | 1<br>(2.86%)   | 2<br>(5.71%)                      | 11<br>(31.43%)     | 16<br>(45.71%) |
| At the prenatal consultation                                                                                                                                                   | 35 | 0<br>(0.00%)         | 10<br>(28.57%) | 12<br>(34.29%) | 10<br>(28.57%)                    | 9<br>(25.71%)      | 1<br>(2.86%)   |
| <b>When do you think the pregnant woman needs to receive a consultation of her measurement on the following ways?</b>                                                          |    |                      |                |                |                                   |                    |                |
|                                                                                                                                                                                |    | Daily                | Weekly         | Monthly        | Only when the values are abnormal | At its own request | Never          |
| By telephone                                                                                                                                                                   | 35 | 0<br>(0.00%)         | 11<br>(31.43%) | 3<br>(8.57%)   | 16<br>(48.71%)                    | 7<br>(20.00%)      | 5<br>(14.29%)  |
| By email                                                                                                                                                                       | 35 | 3<br>(8.57%)         | 12<br>(34.29%) | 6<br>(17.14%)  | 3<br>(8.57%)                      | 9<br>(25.71%)      | 7<br>(20.00%)  |
| By text message                                                                                                                                                                | 35 | 2<br>(5.71%)         | 4<br>(11.43%)  | 2<br>(5.71%)   | 3<br>(8.57%)                      | 10<br>(28.57%)     | 16<br>(45.71%) |
| At the prenatal consultation                                                                                                                                                   | 35 | 1<br>(2.86%)         | 12<br>(34.29%) | 12<br>(34.29%) | 13<br>(37.14%)                    | 6<br>(17.14%)      | 1<br>(2.86%)   |
| <b>On a scale from 1 to 5 (with 5 being mostly relevant), when do you think the pregnant woman needs to be informed in the following situation?</b>                            |    |                      |                |                |                                   |                    |                |
|                                                                                                                                                                                |    | 1                    | 2              | 3              | 4                                 | 5                  |                |
| When the measurements doesn't have any abnormalities                                                                                                                           | 35 | 7<br>(20.00%)        | 10<br>(28.57%) | 11<br>(31.43%) | 2<br>(5.71%)                      | 5<br>(14.29%)      |                |
| When the measurements can't be overviewed due to technical problems                                                                                                            | 35 | 3<br>(8.57%)         | 2<br>(5.71%)   | 5<br>(14.29%)  | 10<br>(28.57%)                    | 15<br>(42.86%)     |                |
| When an adequate follow-up isn't possible due to insufficient compliance by the patient                                                                                        | 35 | 1<br>(2.86%)         | 0<br>(0.00%)   | 6<br>(17.14%)  | 10<br>(28.57%)                    | 18<br>(51.43%)     |                |
| When the measurements can't be overviewed due to problems by the online dashboard                                                                                              | 35 | 1<br>(2.86%)         | 1<br>(2.86%)   | 8<br>(22.86%)  | 10<br>(28.57%)                    | 15<br>(42.86%)     |                |
| When the privacy of the pregnant women is threatened due to problems with the data security                                                                                    | 35 | 1<br>(2.86%)         | 1<br>(2.86%)   | 7<br>(20.00%)  | 9<br>(25.71%)                     | 17<br>(48.57%)     |                |
| <b>Of who do you think the pregnant woman needs to receive an overview or feedback about the results ... (Multiple answers are correct)</b>                                    |    |                      |                |                |                                   |                    |                |

|                                                                                                                                        |    | Automatically  | The obstetrician | The midwife    | The general practitioner | The researcher | No preference | Other        |
|----------------------------------------------------------------------------------------------------------------------------------------|----|----------------|------------------|----------------|--------------------------|----------------|---------------|--------------|
| When there are no abnormal measurements                                                                                                | 35 | 2<br>(5.71%)   | 30<br>(85.71%)   | 19<br>(54.29%) | 8<br>(22.86%)            | 17<br>(48.57%) | 1<br>(2.86%)  | 1<br>(2.86%) |
| When there are abnormal measurements                                                                                                   | 35 | 0<br>(0.00%)   | 32<br>(91.43%)   | 15<br>(42.86%) | 5<br>(14.29%)            | 17<br>(48.57%) | 0<br>(0.00%)  | 1<br>(2.86%) |
| <b>Do you think that the partner of the pregnant women needs to be involved in the services remote monitoring offers?</b>              |    |                |                  |                |                          |                |               |              |
|                                                                                                                                        |    | Yes            |                  |                | No                       |                |               |              |
|                                                                                                                                        | 35 | 22<br>(62.86%) |                  |                | 13<br>(37.14%)           |                |               |              |
| <b>On a scale from 1 to 5 (with 5 being mostly relevant), how would you involve the partner of the pregnant woman in this program?</b> |    |                |                  |                |                          |                |               |              |
|                                                                                                                                        |    | <b>1</b>       | <b>2</b>         | <b>3</b>       | <b>4</b>                 | <b>5</b>       |               |              |
| By involving the partner in the intake conversation                                                                                    | 35 | 2<br>(5.71%)   | 2<br>(5.71%)     | 2<br>(5.71%)   | 15<br>(42.86%)           | 14<br>(40.00%) |               |              |
| By giving the partner an overview of the results of the pregnant women on his Smartphone                                               | 35 | 15<br>(42.86%) | 6<br>(17.14%)    | 5<br>(14.28%)  | 7<br>(20.00%)            | 2<br>(5.71%)   |               |              |
| By informing the partner when measurements are missed                                                                                  | 35 | 11<br>(31.45%) | 3<br>(8.57%)     | 9<br>(25.71%)  | 9<br>(25.71%)            | 3<br>(8.57%)   |               |              |
| By giving feedback of the results to the partner                                                                                       | 35 | 15<br>(42.86%) | 1<br>(2.86%)     | 7<br>(20.00%)  | 8<br>(22.86%)            | 4<br>(11.43%)  |               |              |

## 7. Privacy

| Variable                                                                                                   | N  | Response frequencies |               |                |               |               |
|------------------------------------------------------------------------------------------------------------|----|----------------------|---------------|----------------|---------------|---------------|
| Rate the following questions on a scale from 1 to 5 (with 5 being mostly agree).                           |    |                      |               |                |               |               |
|                                                                                                            |    | 1                    | 2             | 3              | 4             | 5             |
| Would you offer remote monitoring to your patients when their privacy can't guaranteed fully?              | 35 | 15<br>(42.86%)       | 7<br>(20.00%) | 11<br>(31.43%) | 1<br>(2.86%)  | 1<br>(2.86%)  |
| Do you think that remote monitoring is an threat for the patient data?                                     | 35 | 14<br>(40.00%)       | 7<br>(20.00%) | 13<br>(37.14%) | 1<br>(2.86%)  | 0<br>(0.00%)  |
| How import is patient privacy towards the ability to identify gestational complications in an early stage? | 35 | 7<br>(20.00%)        | 4<br>(11.43%) | 14<br>(40.00%) | 5<br>(14.29%) | 5<br>(14.29%) |



## 8. Financial considerations

| Variable                                                                                                                                    | N  | Response frequencies |                  |                |                |                                |                           |                                               |
|---------------------------------------------------------------------------------------------------------------------------------------------|----|----------------------|------------------|----------------|----------------|--------------------------------|---------------------------|-----------------------------------------------|
| <b>What is an acceptable price to pay for remote monitoring?</b>                                                                            |    |                      |                  |                |                |                                |                           |                                               |
|                                                                                                                                             |    | €10/month            | €25/month        | €50/month      | Other          |                                |                           |                                               |
| Yes                                                                                                                                         | 35 | 20<br>(57.14%)       | 2<br>(5.71%)     | 0<br>(0.00%)   | 13<br>(37.14%) |                                |                           |                                               |
| <b>Who has to pay for remote monitoring?</b>                                                                                                |    |                      |                  |                |                |                                |                           |                                               |
|                                                                                                                                             |    | The patient          | The obstetrician | The society    | The hospital   | The obstetrician & the society | The patient & the society | The patient, the obstetrician and the society |
| Yes                                                                                                                                         | 35 | 0<br>(0.00%)         | 1<br>(2.86%)     | 11<br>(31.43%) | 2<br>(5.71%)   | 1<br>(2.86%)                   | 12<br>(34.29%)            | 8<br>(22.86%)                                 |
| <b>Do you think a distinction has to be made in a reimbursement by the insurance between patients with a low risk or a high risk?</b>       |    |                      |                  |                |                |                                |                           |                                               |
|                                                                                                                                             |    | Yes                  |                  |                | No             |                                |                           |                                               |
|                                                                                                                                             | 35 | 21<br>(60.00%)       |                  |                | 14<br>(40.00%) |                                |                           |                                               |
| <b>On a scale from 1 to 5 (with 5 being mostly relevant), which items are important to implement remote monitoring into daily practice?</b> |    |                      |                  |                |                |                                |                           |                                               |
|                                                                                                                                             |    | 1                    | 2                | 3              | 4              | 5                              |                           |                                               |
| An additional training (with an certificate)                                                                                                | 35 | 4<br>(11.43%)        | 1<br>(2.66%)     | 6<br>(17.14%)  | 15<br>(42.86%) | 9<br>(25.71%)                  |                           |                                               |
| Hiring additional staff                                                                                                                     | 35 | 2<br>(5.71%)         | 3<br>(8.57%)     | 12<br>(34.29%) | 11<br>(31.43%) | 7<br>(20.00%)                  |                           |                                               |
| When an independent service will follow-up the patients and gives us information about the remote monitoring services                       | 35 | 2<br>(5.71%)         | 3<br>(8.57%)     | 11<br>(31.43%) | 12<br>(34.29%) | 7<br>(20.00%)                  |                           |                                               |
| When this is an activity which only happens during the working hours                                                                        | 35 | 2<br>(5.71%)         | 7<br>(20.00%)    | 14<br>(40.00%) | 8<br>(22.86%)  | 4<br>(11.43%)                  |                           |                                               |
| When additional space will be made into the work planning so no extra workload will be created                                              | 35 | 0<br>(0.00%)         | 0<br>(0.00%)     | 7<br>(20.00%)  | 13<br>(37.14%) | 15<br>(42.86%)                 |                           |                                               |
