# Supplementary material for: Midwives’, Obstetricians’, and Recently Delivered Mothers’ Perceptions of Remote Monitoring for Prenatal Care: Retrospective Survey
Source: PubMed Central journal article supplement (PMC6487343; doi:10.2196/10887), 2019-04-15
Supplement: jmir_v21i4e10887_app2.pdf [file jmir_v21i4e10887_app2.pdf]

## Questionnaire for Obstetrician

### 1. Background information

| Variable                                                        | N | Response frequencies |                     |                     |                      |                      |
|-----------------------------------------------------------------|---|----------------------|---------------------|---------------------|----------------------|----------------------|
| <b>How many years of work experience do you have in ...?</b>    |   |                      |                     |                     |                      |                      |
|                                                                 |   | <b>0</b>             | <b>&lt; 5 years</b> | <b>5 – 15 years</b> | <b>16 – 25 years</b> | <b>&gt; 25 years</b> |
| A private practice                                              | 9 | 3<br>(33.33%)        | 1<br>(11.11%)       | 4<br>(44.44%)       | 0<br>(0.00%)         | 1<br>(11.11%)        |
| A secondary care center                                         | 9 | 7<br>(77.77%)        | 1<br>(11.11%)       | 1<br>(11.11%)       | 0<br>(0.00%)         | 0<br>(0.00%)         |
| A primary care center                                           | 9 | 0<br>(0.00%)         | 0<br>(0.00%)        | 7<br>(77.77%)       | 1<br>(11.11%)        | 1<br>(11.11%)        |
| <b>How many percent of work experiences do you have on ...?</b> |   |                      |                     |                     |                      |                      |
|                                                                 |   | <b>0 – 20%</b>       | <b>21 – 40%</b>     | <b>41 – 60%</b>     | <b>61 – 80%</b>      | <b>81 – 100%</b>     |
| The delivery room                                               | 9 | 2<br>(22.22%)        | 2<br>(22.22%)       | 2<br>(22.22%)       | 3<br>(33.33%)        | 0<br>(0.00%)         |
| Gynaecology                                                     | 9 | 3<br>(33.33%)        | 6<br>(66.66%)       | 0<br>(0.00%)        | 0<br>(0.00%)         | 0<br>(0.00%)         |
| Oncology                                                        | 9 | 6<br>(66.66%)        | 2<br>(22.22%)       | 1<br>(11.11%)       | 0<br>(0.00%)         | 0<br>(0.00%)         |
| Fertility                                                       | 9 | 8<br>(88.88%)        | 1<br>(11.11%)       | 0<br>(0.00%)        | 0<br>(0.00%)         | 0<br>(0.00%)         |

## 2. Perception about remote monitoring

| Variable                                                                                                                                         | N | Response frequencies |               |               |               |               |
|--------------------------------------------------------------------------------------------------------------------------------------------------|---|----------------------|---------------|---------------|---------------|---------------|
| <b>On a scale from 1 to 5 (with 5 being mostly agree) how would you rate the use of remote monitoring as being an added value for ...</b>        |   |                      |               |               |               |               |
|                                                                                                                                                  |   | <b>1</b>             | <b>2</b>      | <b>3</b>      | <b>4</b>      | <b>5</b>      |
| The pregnant woman                                                                                                                               | 9 | 1<br>(11.11%)        | 0<br>(0.00%)  | 1<br>(11.11%) | 4<br>(44.44%) | 3<br>(33.33%) |
| The midwife                                                                                                                                      | 9 | 2<br>(22.22%)        | 0<br>(0.00%)  | 4<br>(44.44%) | 3<br>(33.33%) | 0<br>(0.00%)  |
| The general practitioner                                                                                                                         | 9 | 2<br>(22.22%)        | 1<br>(11.11%) | 3<br>(33.33%) | 3<br>(33.33%) | 0<br>(0.00%)  |
| The gynecologist                                                                                                                                 | 9 | 1<br>(11.11%)        | 0<br>(0.00%)  | 1<br>(11.11%) | 6<br>(66.67%) | 1<br>(11.11%) |
| The society                                                                                                                                      | 9 | 1<br>(11.11%)        | 0<br>(0.00%)  | 3<br>(33.33%) | 5<br>(55.56%) | 0<br>(0.00%)  |
| <b>On a scale from 1 to 5 (with 5 being mostly agree), how would you rate the devices which are used on this moment to detect pre-eclampsia?</b> |   |                      |               |               |               |               |
|                                                                                                                                                  |   | <b>1</b>             | <b>2</b>      | <b>3</b>      | <b>4</b>      | <b>5</b>      |
| The blood pressure monitor                                                                                                                       | 9 | 0<br>(0.00%)         | 1<br>(11.11%) | 0<br>(0.00%)  | 5<br>(55.56%) | 3<br>(33.33%) |
| The activity tracker                                                                                                                             | 9 | 2<br>(22.22%)        | 4<br>(44.44%) | 3<br>(33.33%) | 0<br>(0.00%)  | 0<br>(0.00%)  |
| The weight scale                                                                                                                                 | 9 | 1<br>(11.11%)        | 3<br>(33.33%) | 3<br>(33.33%) | 2<br>(22.22%) | 0<br>(0.00%)  |
| <b>Rate the following questions on a scale from 1 to 5 (with 5 being mostly agree).</b>                                                          |   |                      |               |               |               |               |
|                                                                                                                                                  |   | <b>1</b>             | <b>2</b>      | <b>3</b>      | <b>4</b>      | <b>5</b>      |
| I can easily convince my patients of the added value of remote monitoring                                                                        | 9 | 1<br>(11.11%)        | 0<br>(0.00%)  | 1<br>(11.11%) | 3<br>(33.33%) | 4<br>(44.44%) |
| The relationship between me and my patients is strongly changed in a positive way                                                                | 9 | 1<br>(11.11%)        | 1<br>(11.11%) | 5<br>(55.56%) | 2<br>(22.22%) | 0<br>(0.00%)  |
| I am obligated to change the prenatal follow-up of my patients by using remote monitoring                                                        | 9 | 1<br>(11.11%)        | 4<br>(44.44%) | 2<br>(22.22%) | 1<br>(11.11%) | 1<br>(11.11%) |

### 3. Application

| Variable                                                                                   | N | Response frequencies |               |               |               |               |
|--------------------------------------------------------------------------------------------|---|----------------------|---------------|---------------|---------------|---------------|
| Rate the following questions on a scale from 1 to 5 (with 5 being mostly agree).           |   |                      |               |               |               |               |
|                                                                                            |   | 1                    | 2             | 3             | 4             | 5             |
| Before the study started, I did already know what remote monitoring meant.                 | 9 | 1<br>(11.11%)        | 3<br>(33.33%) | 1<br>(11.11%) | 2<br>(22.22%) | 2<br>(22.22%) |
| Before the study started, I did already know what remote monitoring aims.                  | 9 | 2<br>(22.22%)        | 0<br>(0.00%)  | 2<br>(22.22%) | 3<br>(33.33%) | 2<br>(22.22%) |
| Before the study started, I already had some practical experiences with remote monitoring. | 9 | 6<br>(66.67%)        | 1<br>(11.11%) | 0<br>(0.00%)  | 2<br>(22.22%) | 0<br>(0.00%)  |
| The use of remote monitoring is an added value on my daily work package.                   | 9 | 0<br>(0.00%)         | 1<br>(11.11%) | 2<br>(22.22%) | 5<br>(55.56%) | 1<br>(11.11%) |
| The use of remote monitoring is an threat for my daily work package.                       | 9 | 1<br>(11.11%)        | 4<br>(44.44%) | 2<br>(22.22%) | 1<br>(11.11%) | 1<br>(11.11%) |

#### 4. Education

| Variable                                                                                                                                                                                | N | Response frequencies |               |               |               |               |
|-----------------------------------------------------------------------------------------------------------------------------------------------------------------------------------------|---|----------------------|---------------|---------------|---------------|---------------|
| On a scale from 1 to 5 (with 5 being mostly agree), on which item do you think (para)medical personnel should have an extra education before they start to work with remote monitoring? |   |                      |               |               |               |               |
|                                                                                                                                                                                         |   | 1                    | 2             | 3             | 4             | 5             |
| Which explanation we have to give the patients before they start to use remote monitoring.                                                                                              | 9 | 1<br>(11.11%)        | 1<br>(11.11%) | 0<br>(0.00%)  | 3<br>(33.33%) | 4<br>(44.44%) |
| How we can support the patients in order to have a high compliance rate.                                                                                                                | 9 | 0<br>(0.00%)         | 1<br>(11.11%) | 1<br>(11.11%) | 3<br>(33.33%) | 4<br>(44.44%) |
| About the technology of the devices which are used for remote monitoring.                                                                                                               | 9 | 0<br>(0.00%)         | 1<br>(11.11%) | 0<br>(0.00%)  | 3<br>(33.33%) | 5<br>(55.56%) |
| About the protocols which have to be used in the remote monitoring of different complications.                                                                                          | 9 | 1<br>(11.11%)        | 0<br>(0.00%)  | 0<br>(0.00%)  | 4<br>(44.44%) | 4<br>(44.44%) |

## 5. Quality and patient safety

| Variable                                                                                                                                              | N | Response frequencies |               |               |               |               |
|-------------------------------------------------------------------------------------------------------------------------------------------------------|---|----------------------|---------------|---------------|---------------|---------------|
| <b>Rate the following questions on a scale from 1 to 5 (with 5 being mostly agree).</b>                                                               |   |                      |               |               |               |               |
|                                                                                                                                                       |   | <b>1</b>             | <b>2</b>      | <b>3</b>      | <b>4</b>      | <b>5</b>      |
| Do you think that remote monitoring will make the patient unnecessarily worried?                                                                      | 9 | 3<br>(33.33%)        | 3<br>(33.33%) | 2<br>(22.22%) | 1<br>(11.11%) | 0<br>(0.00%)  |
| Do you think that remote monitoring will give the patient a false safety feeling?                                                                     | 9 | 1<br>(11.11%)        | 5<br>(55.56%) | 2<br>(22.22%) | 1<br>(11.11%) | 0<br>(0.00%)  |
| Do you think that remote monitoring will make your work easier?                                                                                       | 9 | 1<br>(11.11%)        | 0<br>(0.00%)  | 5<br>(55.56%) | 3<br>(33.33%) | 0<br>(0.00%)  |
| Do you think that a remote monitoring prenatal follow-up program the care for women with a high risk for gestational hypertensive disorders improves? | 9 | 0<br>(0.00%)         | 1<br>(11.11%) | 2<br>(22.22%) | 5<br>(55.56%) | 1<br>(11.11%) |
| Do you think that a shift in healthcare is possible by using remote monitoring?                                                                       | 9 | 1<br>(11.11%)        | 0<br>(0.00%)  | 3<br>(33.33%) | 5<br>(55.56%) | 0<br>(0.00%)  |
| Do you think that remote monitoring will be a standard tool in healthcare in the future?                                                              | 9 | 1<br>(11.11%)        | 0<br>(0.00%)  | 1<br>(11.11%) | 7<br>(77.78%) | 0<br>(0.00%)  |
| Do you think it would be agreeable when more remote monitoring studies will be performed in the future?                                               | 9 | 0<br>(0.00%)         | 1<br>(1.11%)  | 1<br>(11.11%) | 7<br>(77.78%) | 0<br>(0.00%)  |
| Do you think that the blood pressure of the pregnant women can be elevated because of the stress for the result?                                      | 9 | 1<br>(11.11%)        | 1<br>(11.11%) | 2<br>(22.22%) | 5<br>(55.56%) | 0<br>(0.00%)  |
| Do you think that the result of remote monitoring not represent the reality?                                                                          | 9 | 0<br>(0.00%)         | 7<br>(77.78%) | 2<br>(22.22%) | 0<br>(0.00%)  | 0<br>(0.00%)  |
| <b>On a scale from 1 to 5 (with 5 being mostly agree), do you think the measurements will be done correctly by the pregnant women?</b>                |   |                      |               |               |               |               |
|                                                                                                                                                       |   | <b>1</b>             | <b>2</b>      | <b>3</b>      | <b>4</b>      | <b>5</b>      |
| The bloodpressure                                                                                                                                     | 9 | 0<br>(0.00%)         | 1<br>(11.11%) | 1<br>(11.11%) | 7<br>(77.78%) | 0<br>(0.00%)  |
| The weight                                                                                                                                            | 9 | 1<br>(11.11%)        | 0<br>(0.00%)  | 5<br>(55.56%) | 3<br>(33.33%) | 0<br>(0.00%)  |
| The activity- and sleepatarn                                                                                                                          | 9 | 0<br>(0.00%)         | 1<br>(11.11%) | 5<br>(55.56%) | 3<br>(33.33%) | 0<br>(0.00%)  |
| <b>Rate the following questions on a scale from 1 to 5 (with 5 being mostly agree).</b>                                                               |   |                      |               |               |               |               |
|                                                                                                                                                       |   | <b>1</b>             | <b>2</b>      | <b>3</b>      | <b>4</b>      | <b>5</b>      |
| Patients will be reassured by the positive results on the app and will be less likely to have (unnecessary) prenatal visits.                          | 9 | 1<br>(11.11%)        | 0<br>(0.00%)  | 1<br>(11.11%) | 7<br>(77.78%) | 0<br>(0.00%)  |
| Patients will be more worried because they can see their measurements and will have more unscheduled prenatal visits.                                 | 9 | 0<br>(0.00%)         | 8<br>(88.89%) | 1<br>(11.11%) | 0<br>(0.00%)  | 0<br>(0.00%)  |
| Patients need to have an extra prenatal consult when deviations are noticeable in the results.                                                        | 9 | 0<br>(0.00%)         | 2<br>(22.22%) | 3<br>(33.33%) | 4<br>(44.44%) | 0<br>(0.00%)  |
| The feedback of the results to the patients is essential.                                                                                             | 9 | 0<br>(0.00%)         | 1<br>(11.11%) | 1<br>(11.11%) | 7<br>(77.78%) | 0<br>(0.00%)  |
| A lot of information will be become on a way which doesn't take much time                                                                             | 9 | 1<br>(11.11%)        | 2<br>(22.22%) | 1<br>(11.11%) | 5<br>(55.56%) | 0<br>(0.00%)  |
| I don't like the additional reports I get from the researches.                                                                                        | 9 | 1<br>(11.11%)        | 6<br>(66.67%) | 1<br>(11.11%) | 0<br>(0.00%)  | 1<br>(11.11%) |
| A researcher is a new member of the multidisciplinary team. The communication gets more complicated in that way.                                      | 9 | 0<br>(0.00%)         | 4<br>(44.44%) | 3<br>(33.33%) | 1<br>(11.11%) | 1<br>(11.11%) |
| <b>On a scale from 1 to 5 (with 5 being mostly agree), which factors can help to become a successful implementation of remote monitoring?</b>         |   |                      |               |               |               |               |
|                                                                                                                                                       |   | <b>1</b>             | <b>2</b>      | <b>3</b>      | <b>4</b>      | <b>5</b>      |
| Support by the ICT department of the hospital                                                                                                         | 9 | 0<br>(0.00%)         | 1<br>(11.11%) | 2<br>(22.22%) | 5<br>(55.56%) | 1<br>(11.11%) |
| Support by the researchers                                                                                                                            | 9 | 0                    | 0             | 1             | 4             | 4             |

|                               |   |              |               |               |               |               |
|-------------------------------|---|--------------|---------------|---------------|---------------|---------------|
|                               |   | (0.00%)      | (0.00%)       | (11.11%)      | (44.44%)      | (44.44%)      |
| Devotion of the gyneacologist | 9 | 0<br>(0.00%) | 1<br>(11.11%) | 0<br>(0.00%)  | 6<br>(66.67%) | 2<br>(22.22%) |
| Devotion of the midwife       | 9 | 0<br>(0.00%) | 1<br>(11.11%) | 1<br>(11.11%) | 7<br>(77.78%) | 0<br>(0.00%)  |
| Devotion of the hospital      | 9 | 0<br>(0.00%) | 2<br>(22.22%) | 0<br>(0.00%)  | 6<br>(66.67%) | 1<br>(11.11%) |

## 6. Aims

| Variable                                                                                                                   | N | Response frequencies |               |               |               |               |
|----------------------------------------------------------------------------------------------------------------------------|---|----------------------|---------------|---------------|---------------|---------------|
| Rate the following questions on a scale from 1 to 5 (with 5 being mostly agree).                                           |   |                      |               |               |               |               |
|                                                                                                                            |   | 1                    | 2             | 3             | 4             | 5             |
| The insights of the patients in their own behavior and (normal) parameters can be enlarged by the use of remote monitoring | 9 | 1<br>(11.11%)        | 0<br>(0.00%)  | 4<br>(44.44%) | 3<br>(33.33%) | 1<br>(11.11%) |
| Patients can make the connection between their lifestyle and abnormal measurements by using remote monitoring              | 9 | 1<br>(11.11%)        | 3<br>(33.33%) | 2<br>(22.22%) | 3<br>(33.33%) | 0<br>(0.00%)  |
| Prenatal admissions will less occur and will be of a shorter duration by using remote monitoring.                          | 9 | 1<br>(11.11%)        | 2<br>(22.22%) | 2<br>(22.22%) | 4<br>(44.44%) | 0<br>(0.00%)  |
| The patient will have a decent reaction on her results                                                                     | 9 | 0<br>(0.00%)         | 3<br>(33.33%) | 6<br>(66.67%) | 0<br>(0.00%)  | 0<br>(0.00%)  |
| The antihypertensive therapy can be adjusted by the measurements which are become by using remote monitoring               | 9 | 1<br>(11.11%)        | 0<br>(0.00%)  | 0<br>(0.00%)  | 7<br>(77.78%) | 1<br>(11.11%) |
| I can spend more time to the patients who really need this by using remote monitoring                                      | 9 | 0<br>(0.00%)         | 2<br>(22.22%) | 1<br>(11.11%) | 6<br>(66.67%) | 0<br>(0.00%)  |
| Remote monitoring is an added value to the quality of our healthcare                                                       | 9 | 0<br>(0.00%)         | 1<br>(11.11%) | 1<br>(11.11%) | 7<br>(77.78%) | 0<br>(0.00%)  |

## 7. Technology & interoperability

| Variable                                                                                                                                   | N | Response frequencies |              |               |               |               |
|--------------------------------------------------------------------------------------------------------------------------------------------|---|----------------------|--------------|---------------|---------------|---------------|
| <b>Rate the following questions on a scale from 1 to 5 (with 5 being mostly agree).</b>                                                    |   |                      |              |               |               |               |
|                                                                                                                                            |   | 1                    | 2            | 3             | 4             | 5             |
| Do you think it would be an added value when the results of the remote motoring will be automatically send to the patients' medical files? | 9 | 1<br>(11.11%)        | 0<br>(0.00%) | 1<br>(11.11%) | 4<br>(44.44%) | 3<br>(33.33%) |

## 8. Feedback

| Variable                                                                                                                                                                       | N | Response frequencies |               |               |                                   |                    |               |
|--------------------------------------------------------------------------------------------------------------------------------------------------------------------------------|---|----------------------|---------------|---------------|-----------------------------------|--------------------|---------------|
| <b>Indicate which answer is applicable</b>                                                                                                                                     |   |                      |               |               |                                   |                    |               |
|                                                                                                                                                                                |   | Daily                | Weekly        | Monthly       | Only when the values are abnormal | At its own request | Never         |
| When do you think the pregnant woman needs to receive an overview of her measurement?                                                                                          | 9 | 1<br>(11.11%)        | 5<br>(55.56%) | 1<br>(11.11%) | 1<br>(11.11%)                     | 2<br>(22.22%)      | 0<br>(0.00%)  |
| When do you think the pregnant woman needs to receive an overview of the deliberation between the caregivers (based on her measurements) about her results?                    | 9 | 5<br>(55.55%)        | 2<br>(22.22%) | 0<br>(0.00%)  | 4<br>(44.44%)                     | 0<br>(0.00%)       | 0<br>(0.00%)  |
| <b>When do you think the pregnant woman needs to receive an overview (without a consultation by the midwife or the gynecologist) of her measurement on the following ways?</b> |   |                      |               |               |                                   |                    |               |
|                                                                                                                                                                                |   | Daily                | Weekly        | Monthly       | Only when the values are abnormal | At its own request | Never         |
| By telephone                                                                                                                                                                   | 9 | 1<br>(11.11%)        | 0<br>(0.00%)  | 0<br>(0.00%)  | 5<br>(55.56%)                     | 0<br>(0.00%)       | 4<br>(44.44%) |
| By email                                                                                                                                                                       | 8 | 2<br>(25.00%)        | 2<br>(25.00%) | 0<br>(0.00%)  | 2<br>(25.00%)                     | 0<br>(0.00%)       | 2<br>(25.00%) |
| By text message                                                                                                                                                                | 9 | 2<br>(22.22%)        | 1<br>(11.11%) | 0<br>(0.00%)  | 2<br>(22.22%)                     | 2<br>(22.22%)      | 4<br>(44.44%) |
| At the prenatal consultation                                                                                                                                                   | 9 | 4<br>(44.44%)        | 0<br>(0.00%)  | 0<br>(0.00%)  | 2<br>(22.22%)                     | 1<br>(11.11%)      | 3<br>(33.33%) |
| <b>When do you think the pregnant woman needs to receive a consultation of her measurement on the following ways?</b>                                                          |   |                      |               |               |                                   |                    |               |
|                                                                                                                                                                                |   | Daily                | Weekly        | Monthly       | Only when the values are abnormal | At its own request | Never         |
| By telephone                                                                                                                                                                   | 9 | 1<br>(11.11%)        | 1<br>(11.11%) | 0<br>(0.00%)  | 3<br>(33.33%)                     | 2<br>(22.22%)      | 2<br>(22.22%) |
| By email                                                                                                                                                                       | 9 | 0<br>(0.00%)         | 2<br>(22.22%) | 0<br>(0.00%)  | 1<br>(11.11%)                     | 1<br>(11.11%)      | 5<br>(55.56%) |
| By text message                                                                                                                                                                | 9 | 0<br>(0.00%)         | 2<br>(22.22%) | 0<br>(0.00%)  | 1<br>(11.11%)                     | 1<br>(11.11%)      | 5<br>(55.56%) |
| At the prenatal consultation                                                                                                                                                   | 9 | 7<br>(77.78%)        | 1<br>(11.11%) | 0<br>(0.00%)  | 2<br>(22.22%)                     | 1<br>(11.11%)      | 0<br>(0.00%)  |
| <b>On a scale from 1 to 5 (with 5 being mostly relevant), when do you think the pregnant woman needs to be informed in the following situation?</b>                            |   |                      |               |               |                                   |                    |               |
|                                                                                                                                                                                |   | 1                    | 2             | 3             | 4                                 | 5                  |               |
| When the measurements doesn't have any abnormalities                                                                                                                           | 9 | 1<br>(11.11%)        | 4<br>(44.44%) | 1<br>(11.11%) | 2<br>(22.22%)                     | 1<br>(11.11%)      |               |
| When the measurements can't be overviewed due to technical problems                                                                                                            | 9 | 1<br>(11.11%)        | 1<br>(11.11%) | 2<br>(22.22%) | 3<br>(33.33%)                     | 2<br>(22.22%)      |               |
| When an adequate follow-up isn't possible due to insufficient compliance by the patient                                                                                        | 9 | 0<br>(0.00%)         | 1<br>(11.11%) | 1<br>(11.11%) | 4<br>(44.44%)                     | 3<br>(33.33%)      |               |
| When the measurements can't be overviewed due to problems by the online dashboard                                                                                              | 9 | 1<br>(11.11%)        | 0<br>(0.00%)  | 1<br>(11.11%) | 5<br>(55.55%)                     | 2<br>(22.22%)      |               |
| When the privacy of the pregnant women is threatened due to problems with the data security                                                                                    | 9 | 1<br>(11.11%)        | 2<br>(22.22%) | 0<br>(0.00%)  | 5<br>(55.56%)                     | 1<br>(11.11%)      |               |
| <b>Of who do you think the pregnant woman needs to receive an overview or feedback about the results ... (Multiple answers are correct)</b>                                    |   |                      |               |               |                                   |                    |               |

|                                                                                                                                        |   | Automatically | The gynaecologist | The midwife   | The general practitioner | The researcher | No preference | Other        |
|----------------------------------------------------------------------------------------------------------------------------------------|---|---------------|-------------------|---------------|--------------------------|----------------|---------------|--------------|
| When there are no abnormal measurements                                                                                                | 9 | 1<br>(11.11%) | 4<br>(44.44%)     | 1<br>(11.11%) | 0<br>(0.00%)             | 3<br>(33.33%)  | 0<br>(0.00%)  | 0<br>(0.00%) |
| When there are abnormal measurements                                                                                                   | 9 | 0<br>(0.00%)  | 7<br>(77.78%)     | 0<br>(0.00%)  | 0<br>(0.00%)             | 2<br>(22.22%)  | 0<br>(0.00%)  | 0<br>(0.00%) |
| <b>Do you think that the partner of the pregnant women needs to be involved in the services remote monitoring offers?</b>              |   |               |                   |               |                          |                |               |              |
|                                                                                                                                        |   | Yes           |                   |               | No                       |                |               |              |
|                                                                                                                                        | 9 | 2<br>(22.22%) |                   |               | 7<br>(77.78%)            |                |               |              |
| <b>On a scale from 1 to 5 (with 5 being mostly relevant), how would you involve the partner of the pregnant woman in this program?</b> |   |               |                   |               |                          |                |               |              |
|                                                                                                                                        |   | <b>1</b>      | <b>2</b>          | <b>3</b>      | <b>4</b>                 | <b>5</b>       |               |              |
| By involving the partner in the intake conversation                                                                                    | 9 | 2<br>(22.22%) | 0<br>(0.00%)      | 3<br>(33.33%) | 2<br>(22.22%)            | 2<br>(22.22%)  |               |              |
| By giving the partner an overview of the results of the pregnant women on his Smartphone                                               | 9 | 6<br>(66.67%) | 2<br>(22.22%)     | 1<br>(11.11%) | 0<br>(0.00%)             | 0<br>(0.00%)   |               |              |
| By informing the partner when measurements are missed                                                                                  | 9 | 4<br>(44.44%) | 1<br>(11.11%)     | 3<br>(33.33%) | 0<br>(0.00%)             | 1<br>(11.11%)  |               |              |
| By giving feedback of the results to the partner                                                                                       | 9 | 4<br>(44.44%) | 2<br>(22.22%)     | 2<br>(22.22%) | 0<br>(0.00%)             | 1<br>(11.11%)  |               |              |

## 9. Privacy

| Variable                                                                                                   | N | Response frequencies |               |               |               |              |
|------------------------------------------------------------------------------------------------------------|---|----------------------|---------------|---------------|---------------|--------------|
| Rate the following questions on a scale from 1 to 5 (with 5 being mostly agree).                           |   |                      |               |               |               |              |
|                                                                                                            |   | 1                    | 2             | 3             | 4             | 5            |
| Would you offer remote monitoring to your patients when their privacy can't guaranteed fully?              | 9 | 5<br>(55.56%)        | 2<br>(22.22%) | 1<br>(11.11%) | 1<br>(11.11%) | 0<br>(0.00%) |
| Do you think that remote monitoring is an threat for the patient data?                                     | 9 | 2<br>(22.22%)        | 2<br>(22.22%) | 3<br>(33.33%) | 2<br>(22.22%) | 0<br>(0.00%) |
| How import is patient privacy towards the ability to identify gestational complications in an early stage? | 9 | 1<br>(11.11%)        | 3<br>(33.33%) | 2<br>(22.22%) | 3<br>(33.33%) | 0<br>(0.00%) |

## 10. Financial considerations

| Variable                                                                                                                                    | N | Response frequencies |                          |                    |                     |                                            |                                      |                                                       |
|---------------------------------------------------------------------------------------------------------------------------------------------|---|----------------------|--------------------------|--------------------|---------------------|--------------------------------------------|--------------------------------------|-------------------------------------------------------|
| <b>What is an acceptable price to pay for remote monitoring?</b>                                                                            |   |                      |                          |                    |                     |                                            |                                      |                                                       |
|                                                                                                                                             |   | <b>€10/month</b>     | <b>€25/month</b>         | <b>€50/month</b>   | <b>Other</b>        |                                            |                                      |                                                       |
| Yes                                                                                                                                         | 8 | 6<br>(75.00%)        | 1<br>(12.50%)            | 1<br>(12.50%)      | 0<br>(0.00%)        |                                            |                                      |                                                       |
| <b>Who has to pay for remote monitoring?</b>                                                                                                |   |                      |                          |                    |                     |                                            |                                      |                                                       |
|                                                                                                                                             |   | <b>The patient</b>   | <b>The gynaecologist</b> | <b>The society</b> | <b>The hospital</b> | <b>The gynaecologist &amp; the society</b> | <b>The patient &amp; the society</b> | <b>The patient, the gynaecologist and the society</b> |
| Yes                                                                                                                                         | 8 | 1<br>(12.50%)        | 0<br>(0.00%)             | 1<br>(12.50%)      | 0<br>(0.00%)        | 0<br>(0.00%)                               | 6<br>(75.00%)                        | 0<br>(0.00%)                                          |
| <b>Do you think a distinction has to be made in a reimbursement by the insurance between patients with a low risk or a high risk?</b>       |   |                      |                          |                    |                     |                                            |                                      |                                                       |
|                                                                                                                                             |   | <b>Yes</b>           |                          |                    | <b>No</b>           |                                            |                                      |                                                       |
|                                                                                                                                             | 8 | 6<br>(75.00%)        |                          |                    | 2<br>(25.00%)       |                                            |                                      |                                                       |
| <b>Do you think that the cost-saving of remote monitoring exceed the additional costs of remote monitoring?</b>                             |   |                      |                          |                    |                     |                                            |                                      |                                                       |
|                                                                                                                                             |   | <b>Yes</b>           |                          |                    | <b>No</b>           |                                            |                                      |                                                       |
|                                                                                                                                             | 8 | 6<br>(75.00%)        |                          |                    | 2<br>(25.00%)       |                                            |                                      |                                                       |
| <b>On a scale from 1 to 5 (with 5 being mostly relevant), which items are important to implement remote monitoring into daily practice?</b> |   |                      |                          |                    |                     |                                            |                                      |                                                       |
|                                                                                                                                             |   | <b>1</b>             | <b>2</b>                 | <b>3</b>           | <b>4</b>            | <b>5</b>                                   |                                      |                                                       |
| An additional training (with an certificate)                                                                                                | 8 | 0<br>(0.00%)         | 0<br>(0.00%)             | 1<br>(12.50%)      | 6<br>(75.00)        | 1<br>(12.50%)                              |                                      |                                                       |
| Hiring additional staff                                                                                                                     | 8 | 0<br>(0.00%)         | 0<br>(0.00%)             | 1<br>(12.50%)      | 7<br>(87.50%)       | 0<br>(0.00%)                               |                                      |                                                       |
| When an independent service will follow-up the patients and gives us information about the remote monitoring services                       | 8 | 0<br>(0.00%)         | 1<br>(12.50%)            | 6<br>(75.00%)      | 1<br>(12.50%)       | 0<br>(0.00%)                               |                                      |                                                       |
| When this is an activity which only happens during the working hours                                                                        | 8 | 4<br>(50.00%)        | 2<br>(25.00%)            | 1<br>(12.50%)      | 1<br>(12.50%)       | 0<br>(0.00%)                               |                                      |                                                       |
| When additional space will be made into the work planning so no extra workload will be created                                              | 8 | 0<br>(0.00%)         | 2<br>(25.00%)            | 2<br>(25.00%)      | 3<br>(37.50%)       | 1<br>(12.50%)                              |                                      |                                                       |

## 11. Expansion

| Variable                                                                         | N | Response frequencies |              |               |               |               |
|----------------------------------------------------------------------------------|---|----------------------|--------------|---------------|---------------|---------------|
| Rate the following questions on a scale from 1 to 5 (with 5 being mostly agree). |   |                      |              |               |               |               |
|                                                                                  |   | 1                    | 2            | 3             | 4             | 5             |
| I support the remote monitoring services and recommend is to my patients         | 8 | 0<br>(0.00%)         | 0<br>(0.00%) | 3<br>(37.50%) | 2<br>(25.00%) | 3<br>(37.50%) |
| I would recommend this services to my colleges                                   | 8 | 0<br>(0.00%)         | 0<br>(0.00%) | 2<br>(25.00%) | 3<br>(37.50%) | 3<br>(37.50%) |
| I would expand this remote monitoring services over all the hospitals in Belgium | 8 | 0<br>(0.00%)         | 0<br>(0.00%) | 3<br>(37.50%) | 3<br>(37.50%) | 2<br>(25.00%) |
