# Supplementary material for: Midwives’, Obstetricians’, and Recently Delivered Mothers’ Perceptions of Remote Monitoring for Prenatal Care: Retrospective Survey
Source: PubMed Central journal article supplement (PMC6487343; doi:10.2196/10887), 2019-04-15
Supplement: jmir_v21i4e10887_app3.pdf [file jmir_v21i4e10887_app3.pdf]

## Questionnaire for Patients

### 1. Personal information

| Variable                                                                                                                                                                                            | N                                                                                                        |                                                                                             | Response frequencies                                                                                                                   |                                           |                                                              |              |
|-----------------------------------------------------------------------------------------------------------------------------------------------------------------------------------------------------|----------------------------------------------------------------------------------------------------------|---------------------------------------------------------------------------------------------|----------------------------------------------------------------------------------------------------------------------------------------|-------------------------------------------|--------------------------------------------------------------|--------------|
| <b>What was your age at the start of your pregnancy</b>                                                                                                                                             |                                                                                                          |                                                                                             |                                                                                                                                        |                                           |                                                              |              |
| < 20 years                                                                                                                                                                                          | 21-25 years                                                                                              | 26-30 years                                                                                 | 31-35 years                                                                                                                            | 36-40 years                               | > 40 years                                                   | < 20 years   |
| 0<br>(0.00%)                                                                                                                                                                                        | 5<br>(10.64%)                                                                                            | 16<br>(34.04%)                                                                              | 21<br>(44.68%)                                                                                                                         | 4<br>(8.51%)                              | 1<br>(2.13%)                                                 | 0<br>(0.00%) |
| <b>How many pregnancies did you have before this project</b>                                                                                                                                        |                                                                                                          |                                                                                             |                                                                                                                                        |                                           |                                                              |              |
| 1                                                                                                                                                                                                   | 2                                                                                                        | 3                                                                                           | 4                                                                                                                                      | ≥ 5                                       |                                                              |              |
| 21<br>(44.68%)                                                                                                                                                                                      | 16<br>(34.04%)                                                                                           | 8<br>(17.02%)                                                                               | 2<br>(4.26%)                                                                                                                           | 0<br>(0.00%)                              |                                                              |              |
| <b>Did you experience a high blood pressure in a previous pregnancy</b>                                                                                                                             |                                                                                                          |                                                                                             |                                                                                                                                        |                                           |                                                              |              |
| Yes                                                                                                                                                                                                 |                                                                                                          | No                                                                                          |                                                                                                                                        | Inapplicable                              |                                                              |              |
| 17<br>(36.17%)                                                                                                                                                                                      |                                                                                                          | 10<br>(21.28%)                                                                              |                                                                                                                                        | 20<br>(42.55%)                            |                                                              |              |
| <b>What is your highest education level</b>                                                                                                                                                         |                                                                                                          |                                                                                             |                                                                                                                                        |                                           |                                                              |              |
| Lower secondary education                                                                                                                                                                           | Higher secondary education                                                                               | Graduate school                                                                             | University                                                                                                                             |                                           |                                                              |              |
| 4<br>(8.51%)                                                                                                                                                                                        | 12<br>(25.53%)                                                                                           | 20<br>(42.55%)                                                                              | 11<br>(23.40%)                                                                                                                         |                                           |                                                              |              |
| <b>Did you already had a smartphone?</b>                                                                                                                                                            |                                                                                                          |                                                                                             |                                                                                                                                        |                                           |                                                              |              |
| Yes                                                                                                                                                                                                 |                                                                                                          | No                                                                                          |                                                                                                                                        |                                           |                                                              |              |
| 45<br>(95.74%)                                                                                                                                                                                      |                                                                                                          | 2<br>(4.26%)                                                                                |                                                                                                                                        |                                           |                                                              |              |
| <b>Would you buy a smartphone only for telemonitoring during your pregnancy? Or would you buy another type of smartphone if your current device would not be able to be used for telemonitoring</b> |                                                                                                          |                                                                                             |                                                                                                                                        |                                           |                                                              |              |
| Yes, I would buy one. Even without problems during my pregnancy                                                                                                                                     | Yes, I would buy one if I was told that I have a higher risk to develop preeclampsia during my pregnancy | No, I would rather rent a device and pay a premium, even without problems during pregnancy. | No, I would rather rent a device and pay a premium if I was told that I have a higher risk to develop preeclampsia during my pregnancy | No, I would not buy or rent such a device | Yes, I would buy one. Even without problems during pregnancy |              |
| 6<br>(12.77%)                                                                                                                                                                                       | 10<br>(21.28%)                                                                                           | 3<br>(6.38%)                                                                                | 23<br>(48.94%)                                                                                                                         | 5<br>(10.64%)                             | 6<br>(12.77%)                                                |              |
| <b>At what week of your pregnancy would you start to be followed by telemonitoring?</b>                                                                                                             |                                                                                                          |                                                                                             |                                                                                                                                        |                                           |                                                              |              |
| <10 weeks                                                                                                                                                                                           | 10-15 weeks                                                                                              | 15-20 weeks                                                                                 |                                                                                                                                        |                                           |                                                              |              |
| 12<br>(25.53%)                                                                                                                                                                                      | 15<br>(31.91%)                                                                                           | 10<br>(21.28%)                                                                              |                                                                                                                                        |                                           |                                                              |              |

### 2. Privacy

| Variable                                                                                                       | N  | Response frequencies |               |              |              |              |
|----------------------------------------------------------------------------------------------------------------|----|----------------------|---------------|--------------|--------------|--------------|
| <b>Rate the following questions on a scale from 1 to 5 (with 5 being mostly agree).</b>                        |    |                      |               |              |              |              |
|                                                                                                                |    | 1                    | 2             | 3            | 4            | 5            |
| Do you consider the sharing of data (weight, blood pressure and activity) with your doctor as a privacy threat | 47 | 36<br>(76.6%)        | 5<br>(10.64%) | 2<br>(4.26%) | 1<br>(2.13%) | 3<br>(6.38%) |

### 3. Quality and patient safety

| Variable                                                                                                                                                                                                    | N  | Response frequencies |                     |                      |                         |                  |                 |
|-------------------------------------------------------------------------------------------------------------------------------------------------------------------------------------------------------------|----|----------------------|---------------------|----------------------|-------------------------|------------------|-----------------|
| Rate the following questions on a scale from 1 to 5 (with 5 being mostly agree).                                                                                                                            |    |                      |                     |                      |                         |                  |                 |
|                                                                                                                                                                                                             |    | 1                    | 2                   | 3                    | 4                       | 5                |                 |
| This study is important for the follow-up of pregnancies                                                                                                                                                    | 47 | 0<br>(0.00%)         | 1<br>(2.13%)        | 4<br>(8.51%)         | 13<br>(27.66%)          | 29<br>(61.70%)   |                 |
| Telemonitoring gives a feeling of safety                                                                                                                                                                    | 47 | 0<br>(0.00%)         | 1<br>(2.13%)        | 7<br>(14.89%)        | 15<br>(31.91%)          | 24<br>(51.06%)   |                 |
| There was problem to perform the measurements at the appropriate time                                                                                                                                       | 47 | 7<br>(14.89%)        | 17<br>(36.17%)      | 9<br>(19.15%)        | 11<br>(23.40%)          | 3<br>(6.38%)     |                 |
| Performing the measurements was difficult due work                                                                                                                                                          | 47 | 33<br>(70.21%)       | 10<br>(21.28%)      | 0<br>(0.00%)         | 1<br>(2.13%)            | 3<br>(6.38%)     |                 |
| Performing the measurements was difficult due private life (e.g family life)                                                                                                                                | 47 | 13<br>(27.66%)       | 21<br>(44.68%)      | 7<br>(14.89%)        | 3<br>(6.38%)            | 3<br>(6.38%)     |                 |
| Performing the measurements was difficult due my personality (e.g. scatteredness)                                                                                                                           | 47 | 21<br>(44.68)        | 10<br>(21.28%)      | 6<br>(12.77%)        | 8<br>(17.02%)           | 2<br>(4.26%)     |                 |
| Performing the measurements causes difficulty in work                                                                                                                                                       | 47 | 36<br>(76.60%)       | 6<br>(12.77%)       | 1<br>(2.13%)         | 1<br>(2.13%)            | 3<br>(6.38%)     |                 |
| Performing the measurements causes difficulty in private life                                                                                                                                               | 47 | 32<br>(68.09%)       | 11<br>(23.40%)      | 2<br>(4.26%)         | 0<br>(0.00%)            | 2<br>(4.26%)     |                 |
| There was no problem to perform the measurements at the appropriate time                                                                                                                                    | 47 | 1<br>(2.13%)         | 6<br>(12.77%)       | 6<br>(12.77%)        | 20<br>(42.55%)          | 14<br>(29.79%)   |                 |
| Please indicate at the scale below the evaluation of adherence for performing the measurements during your pregnancy (2x/day blood pressure monitoring, 1x/day weight and continue measurement of activity) |    |                      |                     |                      |                         |                  |                 |
|                                                                                                                                                                                                             |    | Inapplicable         | Not consists at all | Often not consistent | Occasionally consistent | Often consistent | Very consistent |
| 10 – 15 weeks                                                                                                                                                                                               | 47 | 35<br>(74.47%)       | 1<br>(2.13%)        | 0<br>(0.00%)         | 0<br>(0.00%)            | 3<br>(6.38%)     | 8<br>(17.02%)   |
| 15 – 20 weeks                                                                                                                                                                                               | 47 | 25<br>(53.19%)       | 0<br>(0.00%)        | 1<br>(2.13%)         | 0<br>(0.00%)            | 9<br>(19.15%)    | 12<br>(25.53%)  |
| 20 – 25 weeks                                                                                                                                                                                               | 47 | 19<br>(40.43%)       | 0<br>(0.00%)        | 0<br>(0.00%)         | 1<br>(2.13%)            | 14<br>(29.79%)   | 13<br>(27.66%)  |
| 25 – 30 weeks                                                                                                                                                                                               | 47 | 12<br>(25.53%)       | 2<br>(4.26%)        | 0<br>(0.00%)         | 3<br>(6.38%)            | 15<br>(31.91%)   | 15<br>(31.91%)  |
| 30 – 35 weeks                                                                                                                                                                                               | 47 | 12<br>(25.53%)       | 1<br>(2.13%)        | 1<br>(2.13%)         | 3<br>(6.38%)            | 12<br>(25.53%)   | 18<br>(38.30%)  |
| Rate the following questions on a scale from 1 to 5 (with 5 being mostly agree).                                                                                                                            |    |                      |                     |                      |                         |                  |                 |
|                                                                                                                                                                                                             |    | 1                    | 2                   | 3                    | 4                       | 5                |                 |
| Performing measurements was                                                                                                                                                                                 | 47 | 39<br>(82.98%)       | 3<br>(6.38%)        | 2<br>(4.26%)         | 1<br>(2.13%)            | 2<br>(4.26%)     |                 |

|                                                                                     |    |                |                |                |                |                |  |
|-------------------------------------------------------------------------------------|----|----------------|----------------|----------------|----------------|----------------|--|
| difficult due physical discomfort                                                   |    |                |                |                |                |                |  |
| Performing measurements was difficult due time related issues                       | 47 | 21<br>(44.68%) | 9<br>(19.15%)  | 10<br>(21.28%) | 1<br>(2.13%)   | 6<br>(12.77%)  |  |
| Performing measurements was difficult due device related issues                     | 47 | 13<br>(27.66%) | 6<br>(12.77%)  | 7<br>(14.89%)  | 14<br>(29.79%) | 7<br>(14.89%)  |  |
| Performing measurements was difficult because of remembering issues                 | 47 | 15<br>(31.91%) | 13<br>(27.66%) | 9<br>(19.15%)  | 6<br>(12.77%)  | 4<br>(8.51%)   |  |
| Performing measurements was difficult because of motivation issues                  | 47 | 33<br>(70.21%) | 9<br>(19.15%)  | 2<br>(4.26%)   | 2<br>(4.26%)   | 1<br>(2.13%)   |  |
| Performing measurements was difficult because of the confrontation with the results | 47 | 32<br>(68.09%) | 9<br>(19.15%)  | 4<br>(8.51%)   | 1<br>(2.13%)   | 1<br>(2.13%)   |  |
| Performing the measurements was difficult due the disturbing of the measurements    | 47 | 37<br>(78.72%) | 7<br>(14.89%)  | 2<br>(4.26%)   | 0<br>(0.00%)   | 1<br>(2.13%)   |  |
| I found the measurements less important during the progression of my pregnancy      | 47 | 34<br>(72.34%) | 5<br>(10.64%)  | 4<br>(8.51%)   | 3<br>(6.38%)   | 1<br>(2.13%)   |  |
| There were no difficulties in the performing of the measurements                    | 47 | 11<br>(23.40%) | 4<br>(8.51%)   | 11<br>(23.40%) | 10<br>(21.28%) | 11<br>(23.40%) |  |

**Rate the following questions on a scale from 1 to 5 (with 5 being mostly agree).**

|                                                                                                              |    | 1              | 2              | 3             | 4            | 5            |  |
|--------------------------------------------------------------------------------------------------------------|----|----------------|----------------|---------------|--------------|--------------|--|
| I found it difficult to use telemonitoring technology                                                        | 47 | 29<br>(61.70%) | 13<br>(27.66%) | 3<br>(6.38%)  | 1<br>(2.13%) | 1<br>(2.13%) |  |
| I found it difficult to use telemonitoring technology because I did not always have my smartphone with me    | 47 | 32<br>(68.09%) | 9<br>(19.15%)  | 5<br>(10.64%) | 1<br>(2.13%) | 0<br>(0.00%) |  |
| I found it difficult to use telemonitoring technology because the technology was too difficult               | 47 | 29<br>(61.70%) | 12<br>(25.53%) | 5<br>(10.64%) | 0<br>(0.00%) | 1<br>(2.13%) |  |
| I found it difficult to use telemonitoring technology because I do not trust medical smartphone applications | 47 | 40<br>(85.11%) | 6<br>(12.77%)  | 1<br>(2.13%)  | 0<br>(0.00%) | 0<br>(0.00%) |  |
| I found it difficult to use telemonitoring technology because                                                | 47 | 32<br>(68.09%) | 8<br>(17.02%)  | 5<br>(10.64%) | 1<br>(2.13%) | 1<br>(2.13%) |  |

|                                                                                               |                                                               |                                                                                                |                                                          |  |  |  |  |
|-----------------------------------------------------------------------------------------------|---------------------------------------------------------------|------------------------------------------------------------------------------------------------|----------------------------------------------------------|--|--|--|--|
| the measurements caused an additional effort and took a lot of time                           |                                                               |                                                                                                |                                                          |  |  |  |  |
| <b>Should every pregnant be followed with telemonitoring?</b>                                 |                                                               |                                                                                                |                                                          |  |  |  |  |
| <b>Yes, independent from pregnancy problems</b>                                               | <b>Yes, but only when there are problems in the pregnancy</b> | <b>Yes, but only when there were problems in a previous pregnancy</b>                          | <b>No, nobody should be followed with telemonitoring</b> |  |  |  |  |
| 14<br>(29.79%)                                                                                | 24<br>(51.06%)                                                | 9<br>(19.15%)                                                                                  | 0<br>(0.00%)                                             |  |  |  |  |
| <b>Would you consider participating again in such studies (multiple answers are possible)</b> |                                                               |                                                                                                |                                                          |  |  |  |  |
| <b>Yes, independent from a high-risk pregnancy</b>                                            | <b>Yes, but only in a high-risk pregnancy</b>                 | <b>Yes, I should also be participating in other studies about telemonitoring in obstetrics</b> | <b>No, I will not be participating in such studies</b>   |  |  |  |  |
| 24<br>(51.06%)                                                                                | 15<br>(31.91%)                                                | 14<br>(29.79%)                                                                                 | 0<br>(0.00%)                                             |  |  |  |  |

#### 4. Feedback

| Within how much time do you want to be contacted about events?'                                                                                                                                                                                                                            |                |                      |                |                |                 |                |
|--------------------------------------------------------------------------------------------------------------------------------------------------------------------------------------------------------------------------------------------------------------------------------------------|----------------|----------------------|----------------|----------------|-----------------|----------------|
| < 3 hours                                                                                                                                                                                                                                                                                  | 3 – 12 hours   | 12 – 24 hours        | 24 – 48 hours  |                |                 |                |
| 13<br>(27.66%)                                                                                                                                                                                                                                                                             | 19<br>(40.43%) | 7<br>(14.89%)        | 5<br>(10.64%)  |                |                 |                |
| Variable                                                                                                                                                                                                                                                                                   | N              | Response frequencies |                |                |                 |                |
| <b>Rate the following questions on a scale from 1 to 5 (with 5 being mostly agree). When insufficient measurements are performed to provide optimal follow-up, the healthcare provider contacts the patients by:</b>                                                                       |                |                      |                |                |                 |                |
|                                                                                                                                                                                                                                                                                            |                | 1                    | 2              | 3              | 4               | 5              |
| SMS                                                                                                                                                                                                                                                                                        | 47             | 7<br>(14.89%)        | 3<br>(6.38%)   | 7<br>(14.89%)  | 14<br>(29.79%)  | 16<br>(34.04%) |
| Telephone                                                                                                                                                                                                                                                                                  | 47             | 3<br>(6.38%)         | 4<br>(8.51%)   | 9<br>(19.15%)  | 10<br>(21.28%)  | 21<br>(44.68%) |
| Mail                                                                                                                                                                                                                                                                                       | 47             | 12<br>(25.53%)       | 7<br>(14.89%)  | 14<br>(29.79%) | 6<br>(12.77%)   | 8<br>(17.02%)  |
| <b>Rate the following questions on a scale from 1 to 5 (with 5 being mostly agree). The appropriate way for the patient to contact the healthcare provider for device related problems</b>                                                                                                 |                |                      |                |                |                 |                |
|                                                                                                                                                                                                                                                                                            |                | 1                    | 2              | 3              | 4               | 5              |
| SMS                                                                                                                                                                                                                                                                                        | 47             | 10<br>(21.28%)       | 3<br>(6.38%)   | 14<br>(29.79%) | 12<br>(25.53%)  | 8<br>(17.02%)  |
| Telephone                                                                                                                                                                                                                                                                                  | 47             | 2<br>(4.26%)         | 0<br>(0.00%)   | 5<br>(10.64%)  | 10<br>(21.28%)  | 30<br>(63.83%) |
| Mail                                                                                                                                                                                                                                                                                       | 47             | 8<br>(17.02%)        | 3<br>(6.38%)   | 9<br>(19.15%)  | 13<br>(27.66%)  | 14<br>(29.79%) |
| SMS                                                                                                                                                                                                                                                                                        | 47             | 10<br>(21.28%)       | 3<br>(6.38%)   | 14<br>(29.79%) | 12<br>(25.53%)  | 8<br>(17.02%)  |
| <b>Rate the following questions on a scale from 1 to 5 (with 5 being mostly agree). The appropriate way for the healthcare provider to contact the patient for device related problems:</b>                                                                                                |                |                      |                |                |                 |                |
|                                                                                                                                                                                                                                                                                            |                | 1                    | 2              | 3              | 4               | 5              |
| SMS                                                                                                                                                                                                                                                                                        | 47             | 11<br>(23.40%)       | 3<br>(6.38%)   | 9<br>(19.15%)  | 12<br>(25.53%)  | 12<br>(25.53%) |
| Telephone                                                                                                                                                                                                                                                                                  | 47             | 2<br>(4.26%)         | 1<br>(2.13%)   | 5<br>(10.64%)  | 10<br>(21.28%)  | 29<br>(61.70%) |
| Mail                                                                                                                                                                                                                                                                                       | 47             | 9<br>(19.15%)        | 8<br>(17.02%)  | 10<br>(21.28%) | 9<br>(19.15%)   | 11<br>(23.40%) |
| <b>Rate the following questions on a scale from 1 to 5 (with 5 being mostly agree). When the measured values are abnormal (e.a. high blood pressure) and the healthcare provider wants to inform the patient about this to provide customized advice, they can contact the patient by:</b> |                |                      |                |                |                 |                |
|                                                                                                                                                                                                                                                                                            |                | 1                    | 2              | 3              | 4               | 5              |
| SMS                                                                                                                                                                                                                                                                                        | 47             | 12<br>(25.53%)       | 5<br>(10.64%)  | 6<br>(12.77%)  | 11<br>(23.40%)  | 13<br>(27.66%) |
| Telephone                                                                                                                                                                                                                                                                                  | 47             | 2<br>(4.26%)         | 1<br>(2.13%)   | 2<br>(4.26%)   | 6<br>(12.77%)   | 36<br>(76.60%) |
| Mail                                                                                                                                                                                                                                                                                       | 47             | 19<br>(40.43%)       | 5<br>(10.64%)  | 7<br>(14.89%)  | 11<br>(23.40%)  | 5<br>(10.64%)  |
| At consultation                                                                                                                                                                                                                                                                            | 47             | 5<br>(10.64%)        | 1<br>(2.13%)   | 8<br>(17.02%)  | 11<br>(23.40%)  | 22<br>(46.81%) |
| <b>Please indicate the preferable way and schedule to receive feedback when the measured values are normal. (multiple answers are possible)</b>                                                                                                                                            |                |                      |                |                |                 |                |
|                                                                                                                                                                                                                                                                                            |                | SMS                  | Telephone      | Mail           | At consultation | No overview    |
| An overview of the results at daily basis                                                                                                                                                                                                                                                  | 47             | 14<br>(29.79%)       | 10<br>(21.28%) | 23<br>(48.94%) | 10<br>(21.28%)  | 10<br>(21.28%) |

|                                                                                                                                                                    |                |                             |                   |                      |                |                |
|--------------------------------------------------------------------------------------------------------------------------------------------------------------------|----------------|-----------------------------|-------------------|----------------------|----------------|----------------|
| An overview of the results at weekly basis                                                                                                                         | 47             | 13<br>(27.66%)              | 10<br>(21.28%)    | 32<br>(68.09%)       | 15<br>(31.91%) | 4<br>(8.51%)   |
| An overview of the results at monthly basis                                                                                                                        | 47             | 11<br>(23.40%)              | 11<br>(23.40%)    | 33<br>(70.21%)       | 23<br>(48.94)  | 2<br>(4.26%)   |
| <b>Who would be the favorable persons to contact you following an event.</b>                                                                                       |                |                             |                   |                      |                |                |
| <b>Obstetrician</b>                                                                                                                                                | <b>Midwife</b> | <b>General practitioner</b> | <b>Researcher</b> | <b>No preference</b> |                |                |
| 40<br>(85.11%)                                                                                                                                                     | 25<br>(53.19%) | 9<br>(19.15%)               | 11<br>(23.40%)    | 6<br>(12.77%)        |                |                |
| <b>Does your partner needs to be more involved in telemonitoring</b>                                                                                               |                |                             |                   |                      |                |                |
|                                                                                                                                                                    | <b>Yes</b>     | <b>No</b>                   |                   |                      |                |                |
|                                                                                                                                                                    | 13<br>(27.66%) | 34<br>(72.34%)              |                   |                      |                |                |
| <b>Rate the following questions on a scale from 1 to 5 (with 5 being mostly agree). The appropriate way for your partner to be more involved in telemonitoring</b> |                |                             |                   |                      |                |                |
|                                                                                                                                                                    |                | <b>1</b>                    | <b>2</b>          | <b>3</b>             | <b>4</b>       | <b>5</b>       |
| By involving the partner in the intake conversation                                                                                                                | 47             | 15<br>(31.91%)              | 4<br>(8.51%)      | 7<br>(14.89%)        | 7<br>(14.89%)  | 14<br>(29.79%) |
| By giving the partner an overview of the results of the pregnant women on his Smartphone                                                                           | 47             | 20<br>(42.55%)              | 7<br>(14.89%)     | 8<br>(17.02%)        | 7<br>(14.89%)  | 5<br>(10.64%)  |
| By informing the partner when measurements are missed                                                                                                              | 47             | 18<br>(38.30%)              | 11<br>(23.40%)    | 8<br>(17.02%)        | 7<br>(14.89%)  | 3<br>(6.38%)   |
| By giving feedback of the results to the partner                                                                                                                   | 47             | 15<br>(31.91%)              | 7<br>(14.89%)     | 11<br>(23.40%)       | 7<br>(14.89%)  | 7<br>(14.89%)  |

## 5. Financial information

| Are you willing to pay 10 euro per month for the telemonitoring service                                                |  |                    |              |                      |               |                |                |                |                |                |               |
|------------------------------------------------------------------------------------------------------------------------|--|--------------------|--------------|----------------------|---------------|----------------|----------------|----------------|----------------|----------------|---------------|
| Yes                                                                                                                    |  | No                 |              |                      |               |                |                |                |                |                |               |
| 12<br>(52.17%)                                                                                                         |  | 11<br>(47.83%)     |              |                      |               |                |                |                |                |                |               |
| Are you willing to pay 25 euro per month for the telemonitoring service                                                |  |                    |              |                      |               |                |                |                |                |                |               |
| Yes                                                                                                                    |  | No                 |              |                      |               |                |                |                |                |                |               |
| 4<br>(40.00%)                                                                                                          |  | 6<br>(60.00%)      |              |                      |               |                |                |                |                |                |               |
| Are you willing to pay 50 euro per month for the telemonitoring service                                                |  |                    |              |                      |               |                |                |                |                |                |               |
| Yes                                                                                                                    |  | No                 |              |                      |               |                |                |                |                |                |               |
| 3 (23.08%)                                                                                                             |  | 10 (76.92%)        |              |                      |               |                |                |                |                |                |               |
| If you have negatively answered the previous question, how much are you willing to pay for the telemonitoring service? |  |                    |              |                      |               |                |                |                |                |                |               |
| €0                                                                                                                     |  | €10                |              | €15                  |               | €25            |                | €30            |                |                |               |
| 14                                                                                                                     |  | 1                  |              | 4                    |               | 1              |                | 1              |                |                |               |
| Variable                                                                                                               |  | N                  |              | Response frequencies |               |                |                |                |                |                |               |
|                                                                                                                        |  |                    |              | 1                    | 2             | 3              | 4              | 5              |                |                |               |
| The telemonitoring service should be offered by the hospital.                                                          |  | 46                 |              | 2<br>(4.35%)         | 0<br>(0.00%)  | 7<br>(15.22%)  | 12<br>(26.09%) | 25<br>(54.35%) |                |                |               |
| The telemonitoring service should be offered by mutualities.                                                           |  | 46                 |              | 4<br>(8.70%)         | 3<br>(6.52%)  | 7<br>(15.22%)  | 9<br>(19.57%)  | 23<br>(50.00%) |                |                |               |
| The telemonitoring service should be offered by social security.                                                       |  | 46                 |              | 5<br>(10.87%)        | 5<br>(10.87%) | 15<br>(32.61%) | 8<br>(17.39%)  | 13<br>(28.26%) |                |                |               |
| I do not care who offers the telemonitoring service.                                                                   |  | 46                 |              | 7<br>(15.22%)        | 5<br>(10.87%) | 6<br>(13.04%)  | 5<br>(10.87%)  | 23<br>(50.00%) |                |                |               |
| Please indicate the following questions with a score from 0 – 10.                                                      |  |                    |              |                      |               |                |                |                |                |                |               |
|                                                                                                                        |  | 1                  | 2            | 3                    | 4             | 5              | 6              | 7              | 8              | 9              | 10            |
| How satisfied are you about the telemonitoring service                                                                 |  | 46<br>0<br>(0.00%) | 0<br>(0.00%) | 1<br>(2.17%)         | 1<br>(2.17%)  | 1<br>(2.17%)   | 3<br>(6.52%)   | 5<br>(10.87%)  | 15<br>(32.61%) | 12<br>(26.09%) | 8<br>(17.39%) |
| How satisfied are you about the telemonitoring devices                                                                 |  | 46<br>1<br>(2.17%) | 0<br>(0.00%) | 1<br>(2.17%)         | 4<br>(8.70%)  | 2<br>(4.35%)   | 6<br>(13.04%)  | 11<br>(23.91%) | 9<br>(19.57%)  | 7<br>(15.22%)  | 5<br>(10.87%) |
| Would you recommend telemonitoring to family or friends                                                                |  | 46<br>1<br>(2.17%) | 0<br>(0.00%) | 1<br>(2.17%)         | 0<br>(0.00%)  | 2<br>(4.35%)   | 3<br>(6.52%)   | 7<br>(15.22%)  | 10<br>(21.74%) | 13<br>(28.26%) | 9<br>(19.57%) |
